# Supplementary material
Source: PubMed Central journal article supplement (PMC4418888)
Supplement: pnas.201500439SI.pdf [file pnas.201500439SI.pdf]

# Supporting Information

Kaplan et al. 10.1073/pnas.1500439112

## SI Materials and Methods

**Cell Culture.** PC12 mHTT<sup>Q103</sup> cells were a gift from Erik S. Schweitzer (David Geffen School of Medicine School of Medicine, University of California, Los Angeles). These cells are stably transfected with the first exon of the human *HTT* gene containing the pathogenic 103 CAG/CAA repeat expansion, under the control of the ecdysteroid promoter (1). The plasmid also contains a *Bombyx mori* ecdysone receptor gene fused at the N terminus with VP16 transactivation domain (2, 3). Addition of the ecdysone analog, tebufenozide, to the cell culture medium is used to initiate the transcription of mutant *HTT* (1).

PC12 mHTT<sup>Q103</sup> cells were cultured in DMEM containing 4.5 g/L glucose, 25 mM Hepes, sodium pyruvate, and no L-glutamine (cat. no. 15-018-CV; Mediatech), supplemented with 10% (vol/vol) Cosmic calf serum, 2 mM L-glutamine, 100 U/mL of penicillin-streptomycin, and 0.5 mg/mL active geneticin. Cells were grown at 37 °C, 9.5% CO<sub>2</sub>, and medium was replaced with fresh medium every 2–3 d. To induce mHTT<sup>Q103</sup> expression for experiments, tebufenozide, a gift from Lynne Moore and Fred H. Gage (The Salk Institute for Biological Studies, La Jolla, CA), was added to the medium at 200 nM final concentration from 1 mM stock in 85% (vol/vol) ethanol.

**High-Throughput Screen of LOC Library.** LOC mother plates with compounds at 4 mg/mL were thawed and spun down (215 × g, 20 °C, 1 min) before use. Biomek FX (Beckman Coulter) robotic liquid dispenser was used to handle all liquid transferring and mixing. Replica daughter plates (D1) were prepared by transferring 2 μL of compound from the mother plate into 384-deep-well clear, round bottom, polypropylene plates (Grenier cat. no. 781270) containing 98 μL of PC12 medium without selective agent geneticin to obtain compound concentration at 80 μL/mL in 2% (vol/vol) DMSO. Twofold serial dilution was performed across five daughter plates by transferring 50 μL of compounds (at 80 μL/mL) from the D1 plate into 50 μL of PC12 medium in daughter plate D2, mixing, and then repeating the process for the remaining three plates. Daughter plate D1 with compounds at 80 μL/mL, daughter plate D3 with compounds at 20 μL/mL, and daughter plate D5 with compounds at 5 μL/mL were then used for the screen. Assay plates were set up by seeding tebufenozide-induced PC12 mHTT<sup>Q103</sup> cells into 384-well black, clear-bottom plates (cat. no. 3712; Corning) at a density of 7,500 cells per well in 57 μL PC12 medium without geneticin. Three microliters of compound from the daughter plates (D1, D3, and D5) were added to the assay plates for a final compound concentration of 4, 1, and 0.25 μL/mL. Four wells containing uninduced PC12 mHTT<sup>Q103</sup> cells and four wells containing medium only were also included on each plate as controls. The assay plates were incubated at 37 °C, 9.5% CO<sub>2</sub> for 48 h. Twenty microliters of 40% (vol/vol) Alamar blue (cat. no. DAL1100; Life Technologies) solution in PC12 medium was added to each well (1:10 final dilution), and the plates were incubated for an additional 12–24 h at 37 °C, 9.5% CO<sub>2</sub>. Alamar blue fluorescence was read on a fluorescence plate reader (PerkinElmer Victor3) with a 530-nm excitation filter and 590-nm emission filter. Each compound concentration was tested in triplicate.

The follow-up testing of primary screen hits was performed in a similar way. Fresh powder stocks of primary hits were reordered from vendors, dissolved in DMSO, and tested in a twofold serial dilution across 10 wells in both tebufenozide-induced and uninduced PC12 mHTT<sup>Q103</sup> cells. Dose–response curves are plotted as mean ± SD and fit to either four-parameter sigmoidal

(for uninduced cells) or bell-shaped (induced) function using Prism (GraphPad Software).

**Molecular Cloning, Protein Expression, and Purification of PDIA.** Sequence for the human catalytic PDI A1 *a* domain was generated by PCR from Ultimate ORF Clone IOH9865 (Life Technologies) as an NdeI-BamHI fragment. The amplified a domain (amino acids 18–134 in the full-length PDI sequence) was then subcloned into NdeI-BamHI sites of pET-15b vector (Novagen) containing the N-terminal His<sub>6</sub> tag and confirmed by DNA sequencing (GeneWiz). The catalytic PDI A1 *a* domain was referred as PDIA throughout the paper.

The PDIA construct was transformed into *Escherichia coli* BL21-Gold (DE3) competent cells (Agilent Technologies) and grown at 37 °C in Luria broth medium with 100 μg/mL ampicillin until OD<sub>600nm</sub> reached 0.5. Expression was induced with 0.5 mM IPTG (isopropyl β-D-1-thiogalactopyranoside) at 37 °C for overnight (usually 12–15 h). Cells were pelleted (4,000 × g, 20 min, 4 °C) and lysed by sonication in buffer containing 50 mM Tris-HCl, pH 8.0, 150 mM NaCl, 1 mM TCEP [Tris(2-carboxyethyl)phosphine], and 5 mM MgCl<sub>2</sub>. Cell lysate was then centrifuged at 19,784 × g for 30 min at 4 °C. The supernatant was loaded onto a chromatography column containing Ni Sepharose 6 Fast Flow beads (GE Life Sciences) equilibrated with PDI Suspension Buffer (50 mM Tris-HCl, pH 8.0, 150 mM NaCl, and 1 mM TCEP). The bound PDIA was eluted with 250 mM imidazole in the same buffer. Recombinant PDIA was further purified using gel filtration Superdex 100 column (GE Life Sciences) in a buffer containing 20 mM Tris-HCl, pH 8.0, 150 mM NaCl, and 1 mM TCEP. The fractions containing PDIA were concentrated, flash frozen, and stored at –80 °C. Protein concentration was determined using absorbance at 280 nm with molar extinction coefficient (ε) 19,940 M<sup>-1</sup>·cm<sup>-1</sup> (for reduced PDIA with N-terminal His<sub>6</sub> tag as calculated from amino acid sequence by ExPASy ProtParam). PDIA purity was verified by SDS/PAGE as more than 98% pure.

For NMR studies, uniformly <sup>15</sup>N-labeled PDIA protein with N-terminal His<sub>6</sub> tag was prepared. PDIA construct was transformed into *E. coli* BL21-Gold (DE3) competent cells (Agilent Technologies). Cells were grown at 37 °C in 1 L of M9 minimal medium supplemented with 2 mM MgSO<sub>4</sub>, 0.1 mM CaCl<sub>2</sub>, 100 μg/mL ampicillin, 22.2 mM glucose, metals 44 solution, 30 mg nicotinic acid, 3 mg *p*-aminobenzoic acid, 0.3 mg biotin, 0.5 mg thiamine hydrochloride, and 0.6 g <sup>15</sup>NH<sub>4</sub>Cl as the sole nitrogen source. When OD<sub>600nm</sub> reached 0.9, temperature was reduced to 20 °C, and protein expression was induced with 0.5 mM IPTG for overnight. Protein was purified as described above except the histidine tag was removed after size exclusion chromatography. Thrombin was added at 5 U/mg protein to cleave the N-terminal His<sub>6</sub> tag. Reaction was allowed to proceed overnight at 4 °C. Next day, protein solution was passed over Ni Sepharose 6 Fast Flow beads (GE Life Sciences) equilibrated with PDI Suspension Buffer, and flow-through containing the <sup>15</sup>N-labeled PDIA protein without histidine tag was concentrated and incubated with 5 mM TCEP overnight with gentle shaking at 4 °C. Four residues, GSHM, which are part of the backbone vector, were present after removal of the His<sub>6</sub> tag. The next day, the protein was dialyzed into MilliQ water, flash frozen, and stored at –80 °C. <sup>15</sup>N-labeled PDIA purity was verified by SDS/PAGE as more than 98% pure.

**ITC.** All ITC experiments were carried out at 25 °C on MicoCal Auto-ITC<sub>200</sub> system (GE Healthcare). Reduced PDIA was

dialyzed into ITC buffer (20 mM sodium phosphate buffer, pH 7.8) and loaded into sample cell at either 30 or 40  $\mu\text{M}$  concentration. The compound solution was loaded into syringe at 400  $\mu\text{M}$  in the same ITC buffer with a final DMSO concentration at 0.4% (vol/vol). ITC titration experiments were carried out at 25  $^{\circ}\text{C}$  with 19 injections, 2  $\mu\text{L}$  per injection, and 180 s between each injection. Reference cell power was set to 5  $\mu\text{cal/s}$ . The control experiment was performed for each compound, where each compound was titrated into buffer to account for heat released due to dilution. This background was subtracted from test data before the final dissociation constant was obtained. Data were analyzed using a one-site binding model in Origin 7.1 software. The dissociation constant,  $K_d$ , was calculated according to equation  $K_d = 1/K_a$ . Gibbs free energy,  $\Delta G$ , was calculated from the equation  $\Delta G = \Delta H - T\Delta S$ . All other parameters,  $K_a$ ,  $n$ ,  $\Delta H$ , and  $\Delta S$ , were determined directly from the titration data.

For ITC experiments with 16F16 pretreatment, 40  $\mu\text{M}$  PDIa (after dialysis into ITC buffer) was treated with 200  $\mu\text{M}$  16F16 for 12–15 h at 4  $^{\circ}\text{C}$ . The next day, the whole solution was loaded into the sample cell. LOC14 at 400  $\mu\text{M}$  in ITC buffer was loaded into syringe and titrated into PDIa + 16F16 loaded cell. For control experiments, ITC buffer with 200  $\mu\text{M}$  16F16 was used in the cell, whereas 400  $\mu\text{M}$  LOC14 in the ITC buffer was used in the syringe.

#### Size Exclusion Buffer Dialysis Experiments for Reversibility of Binding.

Before dialysis, fluorescence emission spectra were recorded from 315- to 550-nm wavelength with excitation at 280 nm on a Tecan Infinite 200 microplate reader. Fluorescence readings were carried out in a 384-well low volume, black bottom plate. Each well contained 40  $\mu\text{L}$  of either LOC14 (300  $\mu\text{M}$ ), PDIa (20  $\mu\text{M}$ ), or PDIa (20  $\mu\text{M}$ ) treated with LOC14 (300  $\mu\text{M}$ ) overnight. All samples were dissolved in buffer B (20 mM sodium phosphate buffer, pH 7.8). After recording the initial fluorescence spectra, samples were then transferred to Amicon Ultra 10-kDa size exclusion filter spin columns for dialysis; 400  $\mu\text{L}$  of buffer B was added to the spin column, the samples were centrifuged for 8 min on a table top microcentrifuge (10,616  $\times g$ , 4  $^{\circ}\text{C}$ ), and afterward, the flow-through was transferred to a new tube. This step was repeated three more times with fresh buffer B. Forty microliters of the collected samples from the flow-through and the spin-column chamber were transferred to a new 384-well plate, and the emission spectra were recorded as described above.

#### Reversibility of LOC14 Binding Using In Vitro Insulin Reduction Assay.

The assay was carried out in a 384-well black, clear bottom plate. For samples containing diluted protein-compound complexes, 500  $\mu\text{M}$  PDIa was incubated with either 750  $\mu\text{M}$  LOC14 or 750  $\mu\text{M}$  irreversible inhibitor 16F16 for 3 h at room temperature. The mixture was then diluted 100-fold into buffer A (10 mM Tris-HCl, pH 8, 150 mM NaCl, and 2 mM EDTA) containing 100  $\mu\text{M}$  bovine insulin. DTT was added last to a 350  $\mu\text{M}$  final concentration. For control samples, the same stock of concentrated PDIa at 500  $\mu\text{M}$  was diluted 100-fold into the same buffer A (containing 100  $\mu\text{M}$  bovine insulin) and then treated with either 7.5 or 750  $\mu\text{M}$  LOC14 or 16F16 test compound. DTT was added last to all wells to a 350  $\mu\text{M}$  final concentration. The final reaction volume in all wells was 80  $\mu\text{L}$ . All experiments were done in triplicate. The assay plate was incubated at 25  $^{\circ}\text{C}$  for 1 h, and then the absorbance at 650 nm was read on a Tecan Infinite 200 microplate reader for each sample consecutively, at 5-min intervals for 1 h. Increase in absorbance is indicative of insulin's  $\beta$ -chain aggregation and precipitation out of solution.

**NMR Spectroscopy.** The residue numbering in all HSQC spectra are based on the sequence of the mature PDI protein, i.e., residue 1 of the mature PDI corresponds to residue 18 in the full-length PDI. The

first 17 amino acids in full-length PDI are the signal sequence that is proteolytically removed out to generate the mature PDI.

The  $^1\text{H}$ - $^{15}\text{N}$  HSQC spectra were performed on Bruker Avance III 500 Ascend (500 MHz) spectrometers (Columbia University) at 300 K. Uniformly  $^{15}\text{N}$ -labeled PDIa was dissolved at 50 or 100  $\mu\text{M}$  in 90%  $\text{H}_2\text{O}/10\%$   $\text{D}_2\text{O}$  (vol/vol), pH 5.1. The  $^1\text{H}$  carrier frequency was positioned at the water resonance. The  $^{15}\text{N}$  carrier frequency was positioned at 115 ppm. The spectral width in the  $^1\text{H}$  dimension was 7,500 Hz, and the width in  $\omega_1$  ( $^{15}\text{N}$ ) dimension was 1,824.6 Hz. Suppression of the water signal was accomplished using the WATERGATE sequence. Heteronuclear decoupling was accomplished using the GARP decoupling scheme.

The 3D NMR experiments were performed on a Bruker Avance 500 MHz spectrometer equipped with a 5-mm TXI cryogenic probe (New York Structural Biology Center). The  $^{15}\text{N}$ -NOESY-HSQC ( $^{15}\text{N}$ -nuclear Overhauser effect spectroscopy-HSQC) and  $^{15}\text{N}$ -TOCSY-HSQC ( $^{15}\text{N}$ -total correlated spectroscopy-HSQC) spectra were recorded at 300 K on the uniformly  $^{15}\text{N}$ -labeled PDIa that was dissolved at 500  $\mu\text{M}$  in 90%  $\text{H}_2\text{O}/10\%$   $\text{D}_2\text{O}$  (vol/vol), pH 5.1. The  $^1\text{H}$  carrier frequency was positioned at the water resonance. The  $^{15}\text{N}$  carrier frequency was positioned at 118 ppm. The spectral width in the  $^1\text{H}$  dimension was 7,501.9 Hz, and the width in  $\omega_2$  ( $^{15}\text{N}$ ) dimension was 2,027.3 Hz. The  $^{15}\text{N}$ -NOESY-HSQC was recorded with a mixing time of 150 ms. The  $^{15}\text{N}$ -TOCSY-HSQC was recorded using an *rf* field strength of 8.3 kHz during the DIPSI-2 mixing time of 60 ms (4). The TOCSY-HSQC spectrum was recorded with gradient enhancement. Data were processed and analyzed using TopSpin 3.1 (Bruker) and Sparky (T. D. Goddard and D. G. Kneller, University of California, San Francisco). The mean chemical shift difference for  $^1\text{H}$  and  $^{15}\text{N}$  ( $\Delta\delta_{\text{NH}}$ ) was calculated using (5)

$$\Delta\delta_{\text{NH}} = \frac{\sqrt{(\Delta\delta_{\text{HN}})^2 + \left[\left(\frac{\Delta\delta_{\text{N}}}{10}\right)\right]^2}}{2}$$

#### In Vitro Drug Metabolism Studies: Mouse Microsome Stability Assay.

The test compound (0.5  $\mu\text{M}$ ) was incubated at 37  $^{\circ}\text{C}$  for up to 45 min in 100 mM of potassium phosphate buffer (pH 7.4) containing microsomal protein (0.5 mg/mL) and an NADPH generating system [0.34 mg/mL  $\beta$ -nicotinamide adenine dinucleotide phosphate (NADP), 1.56 mg/mL glucose-6-phosphate, 1.2 U/mL glucose-6-phosphate dehydrogenase]. At 0-, 5-, 15-, 30-, and 45-min intervals, an aliquot was taken and quenched with acetonitrile (ACN) containing internal standard. No-cofactor controls at 45 min were prepared. Following completion of the experimentation, the samples were analyzed by LC-MS/MS. The half-life ( $t_{1/2}$ ) is calculated using the following equation:  $t_{1/2} = 0.693/k$ , where  $k$  is the elimination rate constant of test compounds obtained by fitting the data to the following equation:  $C = \text{initial} \times \exp(-k \times t)$ . Intrinsic clearance ( $\text{CL}_{\text{int}}$ ) is calculated as liver clearance from the half-life using the following equation:  $\text{CL}_{\text{int}} = k \times (\text{mL incubation}/0.5 \text{ mg protein}) \times (52.5 \text{ mg protein/g liver})$ . Results were reported as peak area ratios of analyte to internal standard. The intrinsic clearance ( $\text{CL}_{\text{int}}$ ) was determined from the first-order elimination constant by nonlinear regression.

#### In Vitro Drug Metabolism Studies: Mouse Plasma Stability Assay.

The test compound (1  $\mu\text{M}$ ) was incubated at 37  $^{\circ}\text{C}$  for up to 120 min in mouse plasma. At 0-, 15-, 30-, 60-, and 120-min intervals, a 100- $\mu\text{L}$  aliquot was taken and quenched with 200  $\mu\text{L}$  acetonitrile (ACN) containing internal standard. Following completion of the experimentation, the samples were analyzed by LC-MS/MS. The half-life ( $t_{1/2}$ ) is calculated using the following equation:  $t_{1/2} = 0.693/k$ , where  $k$  is the elimination rate constant of test compounds obtained by fitting the data to the following equation:  $C = \text{initial} \times \exp(-k \times t)$ . Results were reported as peak area ratios of analyte to internal standard.

**In Vitro Drug Metabolism Studies: Mouse Plasma Protein Binding Assay.** A test compound at the concentration of 2,000 ng/mL in plasma was added into the sample chamber, a dialysis buffer (PBS) was added into the buffer chamber, and the unit was covered with sealing tape and incubated for 4 h at 37 °C on an orbital shaker. Samples were taken from both plasma and the buffer chamber at the end of the incubation, and then analyzed by LC-MS/MS. Protein binding and free fraction percentage were determined using the peak area ratio of analyte to the internal standard (IS). The fraction bound percent was calculated as % Bound =  $100 \times (C_{\text{plasma}} - C_{\text{PBS}})/C_{\text{plasma}}$ . The fraction recovered percent was calculated as % Recovery =  $(V_{\text{PBS}} \times C_{\text{PBS}} + V_{\text{plasma}} \times C_{\text{plasma}})/(V_{\text{plasma}} \times C_{\text{spike}})$ , where  $V_{\text{PBS}}$  is volume of PBS,  $V_{\text{plasma}}$  is volume of plasma,  $C_{\text{PBS}}$  is drug concentration in PBS (analyte/IS peak area ratio),  $C_{\text{plasma}}$  is drug concentration in plasma (Analyte/IS peak area ratio), and  $C_{\text{spike}}$  is drug concentration in spiked plasma (analyte/IS peak area ratio).

**In Vitro Drug Metabolism Studies and in Vivo PK Study.** The microsome stability assay, plasma stability assay, plasma protein binding assay, and in vivo PK study were performed by Alliance Pharma.

**LC/MS.** Proteins were separated by one-dimensional SDS/PAGE electrophoresis and digested with trypsin as described previously (6). Peptides were separated with a NanoAcquity UPLC as described previously (7) except that Solvent B was increased in a 30-min linear gradient between 5% and 40% and postgradient cycled to 95% B for 7 min, followed by a post-run equilibration at 5% B.

Spectra were recorded in sensitivity positive ion mode with a Synapt G2 quadrupole-time-of-flight HDMS mass spectrometer (Waters Corp). Spectra were acquired for the first 59 min of the chromatographic run. Source settings were capillary voltage (3.2 kV), extraction cone (4 V), sampling cone (30 V), and source temperature of 80 °C. The cone gas  $N_2$  flow was 30 L/h. Analyzer settings included quadrupole profile set at manual with mass 1 as 400 (dwell time, 25%; ramp time, 25%), mass 2 as 500 (dwell time, 25%; ramp time, 25%), and mass 3 as 600. A reference sprayer was operated at 500 nL/min to produce a lockmass spectrum with Glu-1-fibrinopeptide B (EGVNDNEEGFFSAR;  $m/z$  785.8426) and leucine enkephalin (YGGFL) at  $m/z$  556.2771 every 30 s.

Data were collected by data-dependent acquisition with a scan time of 0.25 s. A survey scan was conducted over the range of 300–2,000 Da. Acquisition was performed in sensitivity mode and switched when individual ion counts exceeded 1,000 count/s. MS/MS spectra were acquired over the range of 50–2,000  $m/z$ . A maximum of the five most intense ions were selected from a single MS survey scan. Return to MS survey scan was triggered when the intensity exceeded 60,000 counts/s or 3 s had elapsed. Charge state peak detection was enabled for +2, +3, and +4. Collision energy in the trap was ramped from 12 to 20 V for low mass (300 Da) and 40–60 V for high mass (2,000 Da).

Raw spectrum processing was performed with the PLGS software (Vers. 2.5, RC9). The electrospray survey was calibrated to a lock mass of Glu-1-fibrinopeptide B at 785.8426  $m/z$ , averaging three scans with a tolerance of 0.1 Da, adaptive background subtraction with slow algorithm deisotoping function with 30 iterations, and a 3% threshold. MS/MS spectra were calibrated to singly charged leucine enkephalin at  $m/z$  556.2771 with the same settings as for the survey scan. Spectra were processed and exported as .pkl files that were then imported into the Mascot database search program (Vers. 2.3.02; Matrix Science.). Observed masses were searched with Mascot against the full National Center for Biotechnology Information nr protein database of Jan. 4, 2012 (16,826,875 sequences; 5,780,204,515 residues). In addition, a custom database was used with sequence of the protein disulfide isomerase construct used for the reaction. Decoy search was enabled and no taxonomic restriction and up to one missed trypsin cleavage with no fixed modifica-

tions. Charge states of +1, +2, or +3 were considered. Monoisotopic mass tolerance for precursor peptides was 10 ppm, and for products, 0.02 Da. Variable modifications included carbamidomethyl (C), oxidation (M), and a custom modification of C representing inhibitor 16F16 with a monoisotopic mass shift of 284.1160 Da and an elemental composition of C(16) H(16) N(2) O(3).

All raw data files and DDA .pkl files are being deposited in a public repository at <https://chorusproject.org>.

**HD Brain Slice Assay.** Brain slice explants were prepared and transfected as previously described (8). Briefly, brains were taken from postnatal day 10 Sprague–Dawley rat pups (Charles River) and cut into 250- $\mu$ m coronal slices on a vibratome (Vibratome). Brain slices containing striatum and cortex were then placed in individual wells of 12-well plates atop culture medium set in 0.5% agarose and maintained at 32 °C under 5%  $CO_2$ . Co-transfection with YFP and *HTT* exon 1 containing a 73 polyglutamine repeat was done using a biolistic device (Bio-Rad Helios Gene Gun). Positive controls were transfected with YFP only or treated with a combination of 50  $\mu$ M KW-6002 (istradefylline) and 30  $\mu$ M SP600125. Negative control brain slices were treated with 0.1% DMSO carrier only. Striatal MSNs expressing YFP were visualized under fluorescence microscopy and identified based on their location within brain slices and their characteristic morphology. MSNs exhibiting normal-sized cell bodies, and even and continuous expression of YFP in at least two discernible primary dendrites at least two cell body diameters long were scored as healthy.

**Compound Synthesis.** All commercial reagents were used without further purification. All solvents used were reagent or HPLC grade. All reactions were carried out in flame-dried glassware under a nitrogen atmosphere. Chemical yields refer to isolated, spectroscopically pure compounds. Proton ( $^1H$ ) and carbon ( $^{13}C$ ) NMR spectra were recorded on a Bruker Avance III 400- or 500-MHz spectrometer at ambient temperature. Chemical shifts are recorded in parts per million relative to residual solvent  $CDCl_3$  ( $^1H$ , 7.26 ppm;  $^{13}C$ , 77.16 ppm). Multiplicities are reported as follows: s = singlet, d = doublet, t = triplet, q = quartet, m = multiplet, comp m = complex multiplet, td = triplet of doublets.

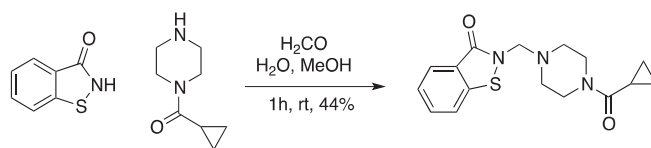

**2-((4-(cyclopropanecarbonyl)piperazin-1-yl)methyl)benzo[d]isothiazol-3(2H)-one (LOC14).** Methanol (1 mL) and a 38% solution of formaldehyde in water (75  $\mu$ L 1.2 eq.) were combined and stirred at room temperature. 1,2-Benzisothiazol-3(2H)-one (98 mg, 1 eq.) and 1-(cyclopropylcarbonyl)piperazine (92  $\mu$ L, 1 eq.) were then added, and the solution was allowed to stir at room temperature until white solids precipitated in about 1 h. These solids were collected via vacuum filtration and recrystallized from ethyl acetate and hexanes providing LOC14 (91 mg, 44%) as a white powder.  $^1H$  NMR (400 MHz,  $CDCl_3$ )  $\delta$  8.037 (d,  $J$  = 8 Hz, 1H), 7.63 (t,  $J$  = 7.2 Hz, 1H), 7.55 (d,  $J$  = 8 Hz, 1H), 7.397 (t,  $J$  = 7.2 Hz, 1H), 4.73 (s, 1H), 3.67 (bs, 4H), 2.73 (bs, 4H), 1.67 (m, 1H), 0.96 (m, 2H), 0.74 (m, 2H);  $^{13}C$  NMR (500 MHz,  $CDCl_3$ )  $\delta$  172.0, 166.3, 141.1, 132.2, 126.9, 125.6, 124.7, 120.4, 65.7, 50.7, 50.2, 45.4, 42.1, 11.0, 7.5. LRMS (APCI+): calculated for  $(C_{16}H_{19}N_3O_2S)$  317.4 g/mol, found  $m/z$  (relative intensity %): 317.07 ( $M^+$ , 1%), 309.10 (1%), 302.90 (1%), 269.16 (4%), 184.15 (10%), 167.19 (4%), 155.18 (100%), 152.08 (100%), 122.12 (6%). This mass fragmentation pattern is consistent with the properties reported for Mannich bases (9–11). The identity of LOC14 as a single compound



under nonionizing conditions was verified by TLC in 10% MeOH/90% dichloromethane, showing a single spot with an  $R_f$  of 0.5 under iodine visualization and by NMR (Fig. S2).

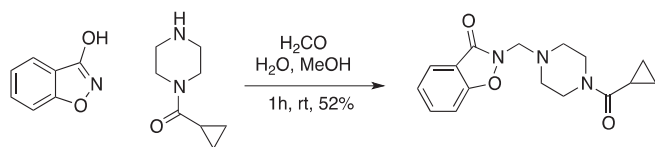

**2-((4-(cyclopropanecarbonyl)piperazin-1-yl)methyl)benzo[d]isoxazol-3(2H)-one (Oxy-LOC14).** Methanol (1 mL) and a 38% solution of formaldehyde in water (75  $\mu$ L, 1.2 eq.) were combined and

stirred at room temperature. 3-Hydroxybenzisoxazole (87 mg, 1 eq.) and 1-(cyclopropylcarbonyl)piperazine (92  $\mu$ L, 1 eq.) were then added, and the solution was allowed to stir at room temperature for 1 h. Precipitation of a white solid was induced by sonication. These solids were collected via vacuum filtration and recrystallized from ethyl acetate and hexanes providing Oxy-LOC14 (101 mg, 52%) as a white powder.  $^1\text{H}$  NMR (400 MHz,  $\text{CDCl}_3$ )  $\delta$  7.83 (d,  $J = 8$  Hz, 1H), 7.64 (t,  $J = 6$  Hz, 1H), 7.30 (t,  $J = 8$  Hz, 1H), 7.23 (d,  $J = 8.4$  Hz, 1H), 4.93 (s, 2H), 3.68 (bs, 4H), 2.78 (bs, 4H), 1.67 (m, 1H), 0.95 (m, 2H), 0.74 (m, 2H);  $^{13}\text{C}$  NMR (500 MHz,  $\text{CDCl}_3$ )  $\delta$  171.9, 163.4, 160.3, 133.69, 124.5, 123.6, 115.94, 110.0, 67.136, 50.5, 50.0, 45.3, 42.0, 10.8, 7.42.

- Aiken CT, Tobin AJ, Schweitzer ES (2004) A cell-based screen for drugs to treat Huntington's disease. *Neurobiol Dis* 16(3):546–555.
- Suhr ST, Gil EB, Senut MC, Gage FH (1998) High level transactivation by a modified *Bombyx* ecdysone receptor in mammalian cells without exogenous retinoid X receptor. *Proc Natl Acad Sci USA* 95(14):7999–8004.
- Vilaboa N, Boellmann F, Voellmy R (2011) Gene switches for deliberate regulation of transgene expression: Recent advances in system development and uses. *J Genetic Syndrome Gene Therapy* 2(3):107.
- Kemmink J, Darby NJ, Dijkstra K, Scheek RM, Creighton TE (1995) Nuclear magnetic resonance characterization of the N-terminal thioredoxin-like domain of protein disulfide isomerase. *Protein Sci* 4(12):2587–2593.
- Williamson MP (2013) Using chemical shift perturbation to characterise ligand binding. *Prog Nucl Magn Reson Spectrosc* 73:1–16.
- Cardinale CJ, et al. (2008) Termination factor Rho and its cofactors NusA and NusG silence foreign DNA in *E. coli*. *Science* 320(5878):935–938.
- Yang WS, et al. (2014) Regulation of ferroptotic cancer cell death by GPX4. *Cell* 156(1-2):317–331.
- Reinhart PH, et al. (2011) Identification of anti-inflammatory targets for Huntington's disease using a brain slice-based screening assay. *Neurobiol Dis* 43(1):248–256.
- Idhayadhulla A, Surendra Kumar R, Abdul Nasser AJ, Manilal A (2011) Synthesis and antimicrobial activity of some new Mannich base derivatives. *J Chem Pharm Res* 3(4):904–911.
- Holla BS, Shivananda MK, Shenoy MS, Antony G (1998) Studies on arylfuran derivatives. Part VII. Synthesis and characterization of some Mannich bases carrying halophenylfuryl moieties as promising antibacterial agents. *Farmaco* 53(8-9):531–535.
- Fuchslueger U, Socher G, Grether HJ, Grasserbauer M (1999) Capillary supercritical fluid chromatography/mass spectrometry of phenolic mannich bases with dimethyl ether modified ethane as the mobile phase. *Anal Chem* 71(13):2324–2333.

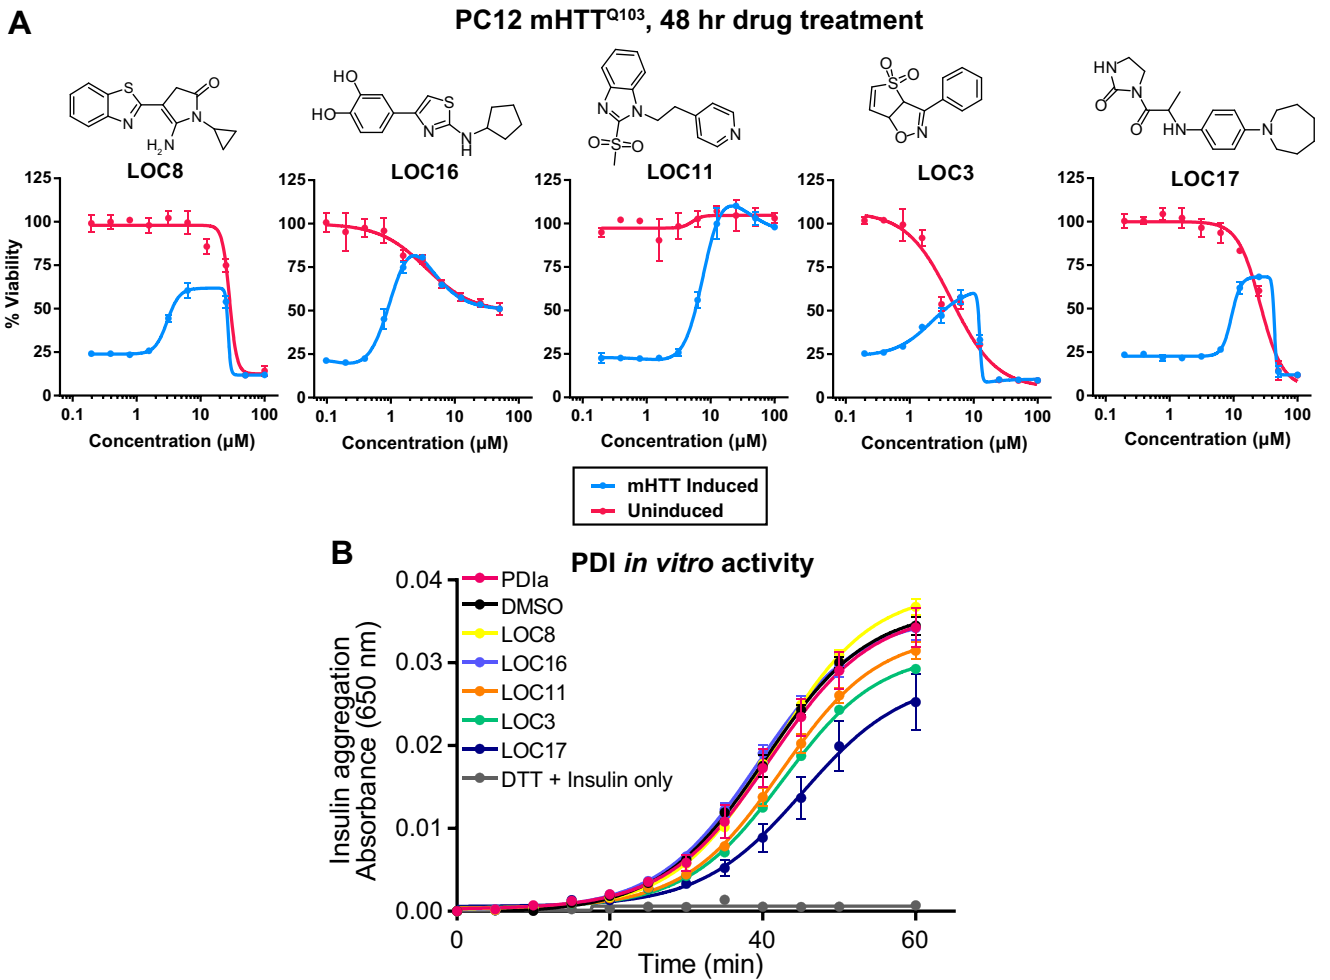

**Fig. S1.** Evaluation of hits from high-throughput screen. (*A*) Dose-response curves of five additional HTS hits that rescued PC12 cells from mHTT<sup>Q103</sup>-induced cell death as measured by Alamar blue fluorescence after 48-h treatment. Data from cells induced to express mHTT<sup>Q103</sup> (blue) and cells not expressing mHTT<sup>Q103</sup> (red) are plotted as mean percent of DMSO-treated uninduced cells  $\pm$  SD. Experiments were performed in triplicate. (*B*) The five hits at 75  $\mu$ M are evaluated in counter screen for their ability to inhibit the enzymatic activity of PDIa (5  $\mu$ M) in the insulin aggregation assay. Experiments were performed in duplicate with data plotted as mean  $\pm$  SEM.

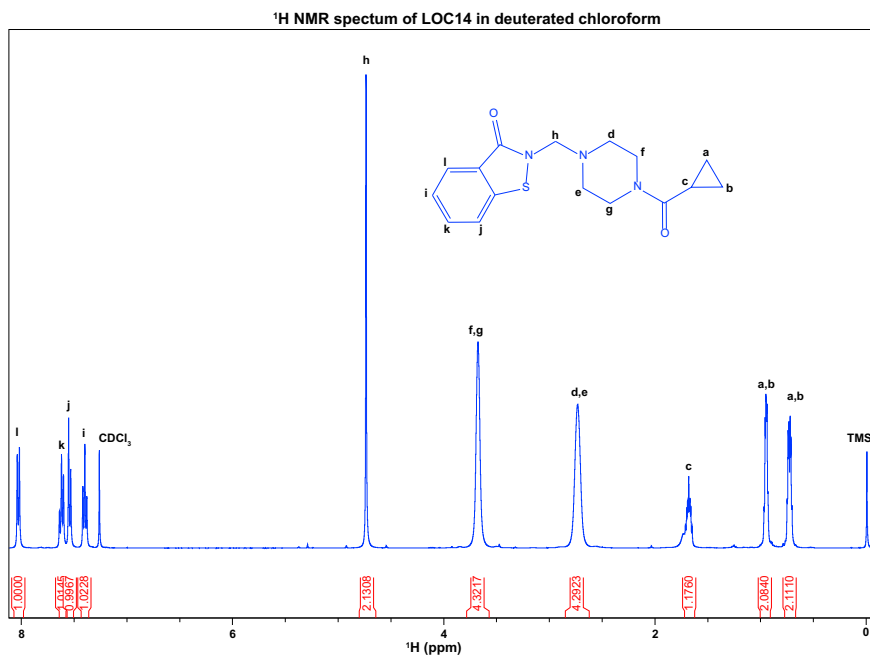

Fig. S2.  $^1\text{H}$  NMR spectrum of LOC14. Resynthesized LOC14 structure validated by NMR.

**Fluorescence emission spectra of PD1a bound to LOC14 before and after size-exclusion buffer exchange**

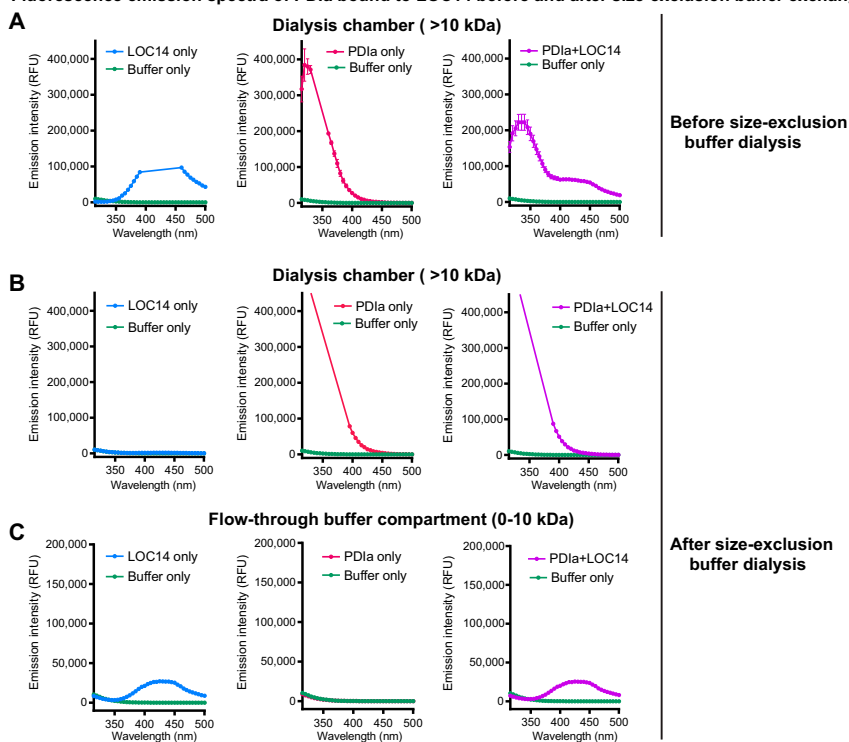

Fig. S3. LOC14 binds reversibly to PD1a. Fluorescence emission spectra of LOC14, PD1a, or PD1a-LOC14 complex (A) before or (B and C) after size-exclusion buffer dialysis. For the dialysis 10-kDa size exclusion filter spin columns were used. Fluorescence emission spectra of (B) sample fractions larger than 10 kDa that were retained in the dialysis chamber or (C) those collected from the flow-through of dialysis. All samples were excited at 280 nm, and emission spectra recorded from 315 to 550 nm.

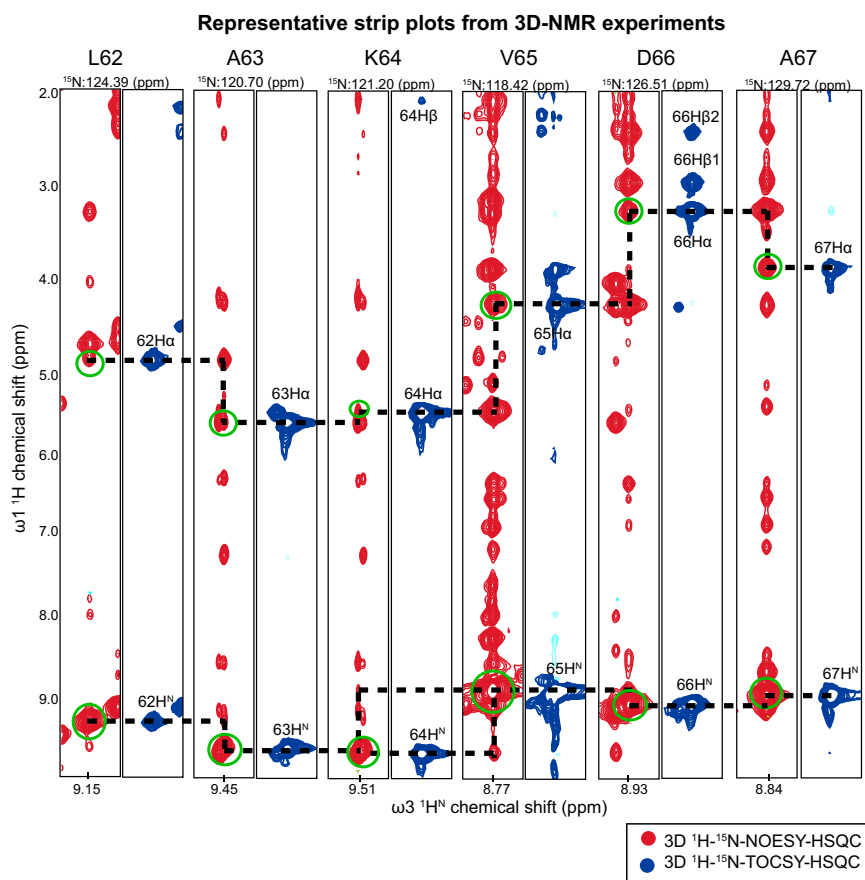

**Fig. S4.** 3D-NMR experiments to assign reduced PDIa. Representative strip plots of 3D  $^1\text{H}$ - $^{15}\text{N}$ -NOESY-HSQC (red) and 3D  $^1\text{H}$ - $^{15}\text{N}$ -TOCSY-HSQC (blue) for residues L62-A67 in the reduced a domain of PDI A1. The peaks represent NOE signal between the amide hydrogen to any hydrogen within its own spin system (for  $^{15}\text{N}$ -TOCSY-HSQC) or to any hydrogen within 5 Å proximity in space ( $^{15}\text{N}$ -NOESY-HSQC).  $^{15}\text{N}$ -TOCSY-HSQC spectrum helped identify the spin system and the NOEs corresponding to the amide, alpha, or beta protons within that spin system (labeled). Those assigned NOEs were then transferred to  $^{15}\text{N}$ -NOESY-HSQC (green circles) to be used for sequential assignments (dotted black path).

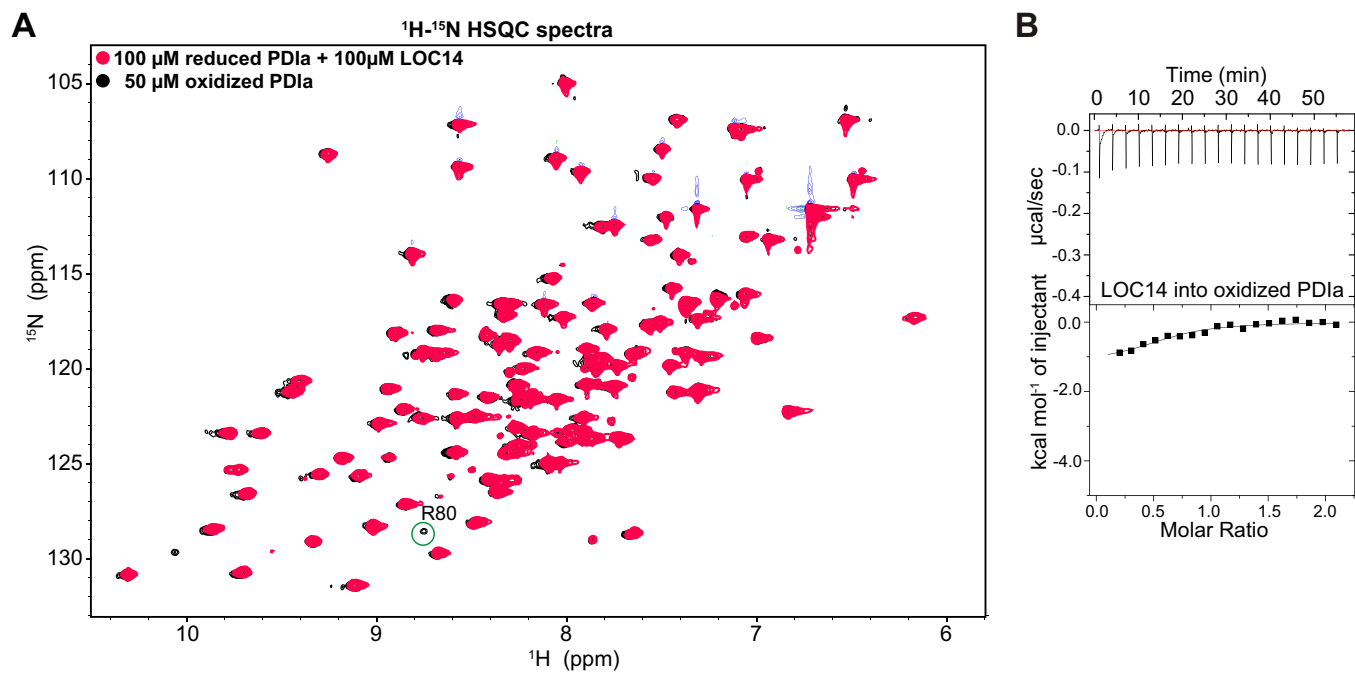

**Fig. 55.** LOC14 binding to PD1a induces an oxidized conformation in the protein. (A) Superimposed  $^1\text{H}$ - $^{15}\text{N}$  HSQC spectra of 50  $\mu\text{M}$  oxidized PD1a alone (black) and 100  $\mu\text{M}$  reduced PD1a treated with 100  $\mu\text{M}$  LOC14 (red). Residue R80 (green circle) is the only peak that is different between the two spectra. (B) Calorimetric titration of 400  $\mu\text{M}$  LOC14 into 40  $\mu\text{M}$  oxidized PD1a. (Upper) Raw data of the heat released. (Lower) Binding isotherm of the reaction. Data are fit to one-site binding model after subtracting the heat released from titrating the compound alone into buffer.

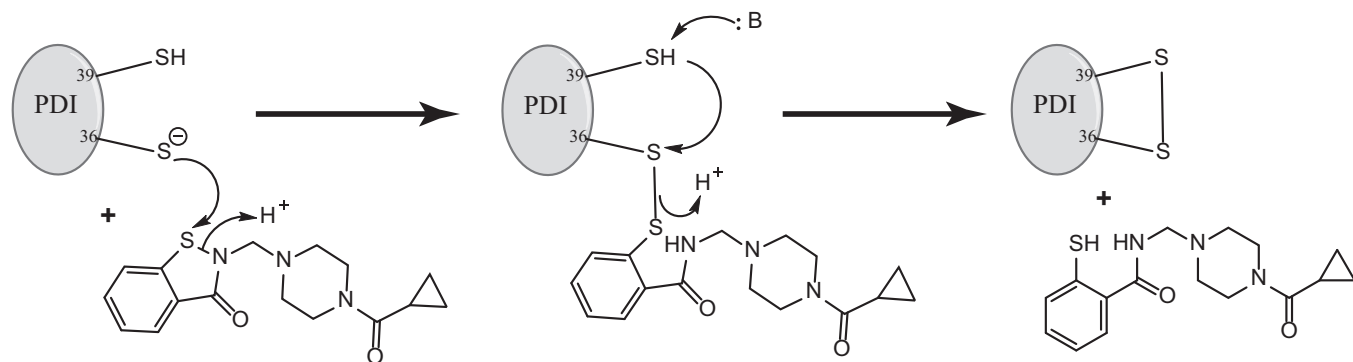

**Fig. 56.** Possible mechanism for LOC14 modulation of PDI activity; 36 and 39 correspond to the residue number of the two cysteines in the active site. The residue numbering are based on the sequence of the mature PDI protein.



**Table S1.  $^1\text{H}$  and  $^{15}\text{N}$  chemical shifts of reduced PDIIa at 300 K**

| Residue | N, ppm  | H <sup>N</sup> , ppm | Side chain, ppm                                               |
|---------|---------|----------------------|---------------------------------------------------------------|
| E4      | 122.606 | 8.592                |                                                               |
| E5      | 120.830 | 8.278                |                                                               |
| E6      | 122.476 | 8.770                |                                                               |
| V9      | 123.758 | 7.881                |                                                               |
| L10     | 128.210 | 9.010                |                                                               |
| V11     | 124.223 | 8.285                |                                                               |
| L12     | 126.230 | 8.438                |                                                               |
| R13     | 118.214 | 8.923                |                                                               |
| K14     | 122.697 | 8.888                |                                                               |
| S15     | 108.871 | 8.077                |                                                               |
| N16     | 117.748 | 7.567                | N <sup>δ2</sup> = 106.808, H <sup>δ21/δ22</sup> = 7.424/6.529 |
| F17     | 123.466 | 7.890                |                                                               |
| A18     | 119.035 | 8.760                |                                                               |
| E19     | 119.095 | 8.164                |                                                               |
| A20     | 123.469 | 7.710                |                                                               |
| L21     | 117.734 | 7.482                |                                                               |
| A22     | 116.058 | 7.069                |                                                               |
| A23     | 118.910 | 7.356                |                                                               |
| H24     | 116.088 | 7.157                |                                                               |
| K25     | 123.330 | 8.247                |                                                               |
| Y26     | 115.457 | 8.195                |                                                               |
| L27     | 126.080 | 8.386                |                                                               |
| L28     | 131.530 | 9.127                |                                                               |
| V29     | 126.747 | 9.687                |                                                               |
| E30     | 128.172 | 8.455                |                                                               |
| F31     | 129.058 | 9.879                |                                                               |
| Y32     | 121.531 | 8.973                |                                                               |
| A33     | 119.954 | 7.087                |                                                               |
| W35     | 109.824 | 5.927                | N <sup>ε1</sup> = 130.763, H <sup>ε1</sup> = 10.265           |
| C36     | 126.466 | 6.658                |                                                               |
| G37     | 118.879 | 9.039                |                                                               |
| H38     | 127.681 | 9.495                |                                                               |
| C39     | 128.106 | 9.655                |                                                               |
| K40     | 123.673 | 8.755                |                                                               |
| A41     | 119.935 | 7.481                |                                                               |
| L42     | 116.669 | 7.386                |                                                               |
| A43     | 121.064 | 7.298                |                                                               |
| E45     | 118.420 | 7.006                |                                                               |
| Y46     | 124.312 | 8.615                |                                                               |
| A47     | 117.847 | 7.785                |                                                               |
| K48     | 120.818 | 7.882                |                                                               |
| A49     | 123.428 | 8.177                |                                                               |
| A50     | 119.508 | 7.810                |                                                               |
| G51     | 107.237 | 8.569                |                                                               |
| K52     | 124.986 | 8.111                |                                                               |
| K54     | 119.796 | 7.720                |                                                               |
| A55     | 122.995 | 7.943                |                                                               |
| E56     | 113.965 | 7.404                |                                                               |
| G57     | 109.639 | 7.934                |                                                               |
| S58     | 112.370 | 7.751                |                                                               |
| E59     | 125.733 | 9.108                |                                                               |
| I60     | 122.727 | 8.517                |                                                               |
| R61     | 122.631 | 7.928                |                                                               |
| L62     | 124.677 | 9.170                |                                                               |
| A63     | 120.708 | 9.426                |                                                               |
| K64     | 121.355 | 9.496                |                                                               |
| V65     | 119.453 | 8.757                |                                                               |
| D66     | 127.272 | 8.925                |                                                               |
| A67     | 130.461 | 8.824                |                                                               |
| T68     | 109.454 | 8.563                |                                                               |
| E69     | 122.351 | 6.819                |                                                               |
| E70     | 120.370 | 8.359                |                                                               |
| S71     | 115.507 | 7.457                |                                                               |

**Table S1. Cont.**

| Residue | N, ppm  | H <sup>N</sup> , ppm | Side chain, ppm                                               |
|---------|---------|----------------------|---------------------------------------------------------------|
| D72     | 121.609 | 8.363                |                                                               |
| L73     | 121.094 | 7.787                |                                                               |
| A74     | 119.028 | 8.054                |                                                               |
| Q75     | 116.627 | 8.116                | N <sup>ε2</sup> = 111.587, H <sup>ε21/ε22</sup> = 7.315/6.725 |
| Q76     | 121.674 | 8.059                | N <sup>ε2</sup> = 110.057, H <sup>ε21/ε22</sup> = 7.071/6.492 |
| Y77     | 113.025 | 7.102                |                                                               |
| G78     | 108.218 | 7.454                |                                                               |
| V79     | 119.717 | 7.869                |                                                               |
| R80     | 128.940 | 8.751                |                                                               |
| G81     | 107.673 | 7.120                |                                                               |
| Y82     | 117.429 | 8.215                |                                                               |
| T84     | 117.726 | 8.725                |                                                               |
| I85     | 130.612 | 9.677                |                                                               |
| K86     | 125.608 | 9.317                |                                                               |
| F87     | 123.446 | 9.632                |                                                               |
| F88     | 129.165 | 9.316                |                                                               |
| R89     | 122.288 | 8.888                |                                                               |
| N90     | 123.221 | 9.885                | N <sup>δ2</sup> = 111.981, H <sup>δ21/δ22</sup> = 7.490/6.714 |
| G91     | 108.367 | 9.284                |                                                               |
| D92     | 119.065 | 7.617                |                                                               |
| T93     | 116.728 | 8.284                |                                                               |
| A94     | 123.961 | 8.267                |                                                               |
| K97     | 121.314 | 8.613                |                                                               |
| E98     | 124.993 | 8.968                |                                                               |
| Y99     | 126.503 | 8.354                |                                                               |
| G102    | 104.770 | 8.033                |                                                               |
| R103    | 118.531 | 8.460                |                                                               |
| E104    | 116.493 | 7.840                |                                                               |
| A105    | 125.291 | 9.731                |                                                               |
| D106    | 113.952 | 8.841                |                                                               |
| D107    | 119.391 | 7.297                |                                                               |
| I108    | 121.087 | 7.404                |                                                               |
| V109    | 117.320 | 8.005                |                                                               |
| N110    | 116.555 | 8.376                | N <sup>δ2</sup> = 113.21, H <sup>δ21/δ22</sup> = 7.547/6.950  |
| W111    | 121.654 | 8.194                | N <sup>ε1</sup> = 129.61, H <sup>ε1</sup> = 10.057            |
| L112    | 118.570 | 8.303                |                                                               |
| K113    | 118.715 | 8.345                |                                                               |
| K114    | 117.413 | 7.326                |                                                               |
| R115    | 116.669 | 7.386                |                                                               |
| T116    | 107.365 | 7.075                |                                                               |
| G117    | 110.022 | 7.539                |                                                               |
| A119    | 123.961 | 8.267                |                                                               |
| A120    | 128.636 | 7.643                |                                                               |

No HSQC peak detected for D1, A2, D7, H8, L53, S95, T100, and A101. Proline residues (P3, P34, P44, P83, P96, and P118) that lack amide protons are also not shown in Table S1. A94 and A119 peaks overlap and L42 and R115 peaks overlap.

**Table S2. Intrinsic clearance of LOC14 in mouse liver microsomes**

| Compound         | Elimination rate constant, k | Half-life (t <sub>1/2</sub> ), min | Intrinsic clearance (CL <sub>int</sub> ), mL/min/g liver |
|------------------|------------------------------|------------------------------------|----------------------------------------------------------|
| LOC14            | 0.0016                       | 438.7                              | 0.17                                                     |
| 7-Ethoxycoumarin | 0.2341                       | 3.0                                | 24.58                                                    |

Compound concentration was 0.5 μM. 7-Ethoxycoumarin, a substrate of cytochrome P450 enzymes, was used as a control.

**Table S3. Stability of LOC14 in mouse plasma**

| Compound  | Elimination rate constant, k | Half-life ( $t_{1/2}$ ), h | % Remaining after 2-h incubation |
|-----------|------------------------------|----------------------------|----------------------------------|
| LOC14     | 0.0049                       | 2.4                        | 49.9                             |
| Enalapril | 0.0201                       | 0.6                        | 4.3                              |

Compound concentration was 1.0  $\mu$ M. Enalapril, which undergoes degradation in plasma, was used as a control compound.

**Table S4. LOC14 plasma protein binding**

| Compound | % Bound           | % Recovery        |
|----------|-------------------|-------------------|
| LOC14    | $-18.76 \pm 4.09$ | $113.81 \pm 0.76$ |
| Warfarin | $94.21 \pm 0.10$  | $109.50 \pm 3.54$ |

Compound concentration was 2000 ng/mL. Warfarin, an anticoagulant, was used as a control compound. Data are shown as mean  $\pm$  SD ( $n = 3$ ).
